# Supplementary material
Source: PubMed Central journal article supplement (PMC4066585)
Supplement: NIHMS57650-supplement-1.pdf [file NIHMS57650-supplement-1.pdf]

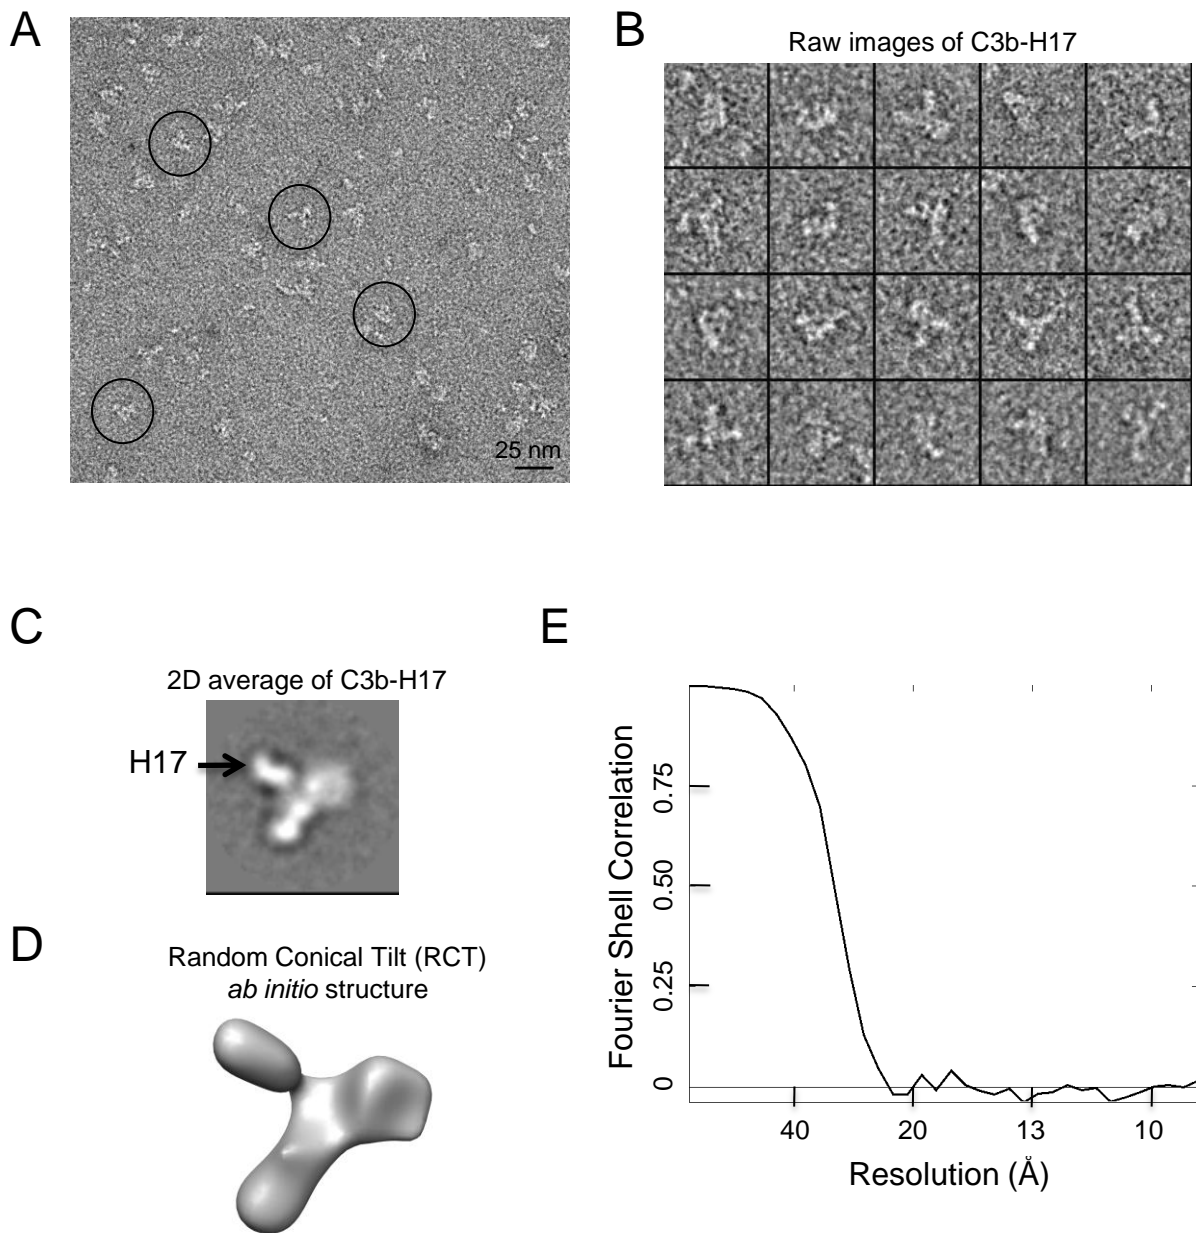

**Supplementary Figure 1. Electron Microscopy of C3b-H17.** (A) A selected EM field of C3b-H17. Scale bar corresponds to 25 nm. Some particles are highlighted within circles. (B) A gallery of selected raw images of C3b-H17. (C) 2D average of C3b-H17 using for the RCT reconstruction. (D) One view of the RCT structure. (E) The resolution of the structure was estimated using the Fourier Shell Correlation of two independent volumes. At a correlation of 0.5, the estimated resolution is 30 Å.
